# Supplementary material
Source: publisher figshare collection journal article supplement (https://acs.figshare.com/ndownloader/files/10194291)
Supplement: Supplementary file 1 [file 10194291]

Compound	Smiles	IC50 HCT116 oxic mM	IC50 HCT116 Hypoxic mM	HCT116 HCR (Oxic/hypoxic)	SR 15Gy	Drug SER
		± SE	± SE	± SE	± SE	± SE
6	O=S(CN1C=CN=C1[N+]([O-])=O)(NCCOC)=O	4.9 ± 0.8	0.08 ± 0.04	46 ± 2	6.3 ± 0.3	1.2
7	O=S(CN1C=CN=C1[N+]([O-])=O)(NCCO)=O	3.3 ± 0.6	0.11 ± 0.06	40 ± 33	2.6 ± 0.9	1.11 ± 0.02
8	O=S(CN1C=CN=C1[N+]([O-])=O)(NCCN2CCOCC2)=O	4.0 ± 0.9	0.08 ±0.01	50 ± 11	10.5	1.28 ± 0.04
9	O=S(CN1C=CN=C1[N+]([O-])=O)(NCCN2CCCC2)=O	0.8 ± 0.4	0.011 ± 0.005	96 ± 34	1.7 ± 0.5
10	O=S(CN1C=CN=C1[N+]([O-])=O)(NCC(O)=O)=O	3.5 ± 1.7	0.9 ± 0.6	10 ± 14	4 ± 1
11	O=S(CN1C=CN=C1[N+]([O-])=O)(NCCC(O)=O)=O	5 ±2.8	4.4 ± 1.3	1 ± 1	2.0 ± 0.5
12	O=S(CN1C=CN=C1[N+]([O-])=O)(N2CCOCC2)=O	0.38 ± 0.01	0.03 ± 0.01	11 ± 4	3.8 ± 0.9	1.11 ± 0.01
13	O=S(CCN1C=CN=C1[N+]([O-])=O)(NCCOC)=O	1.8 ± 0.6	0.4 ± 0.2	5 ± 2	6.4 ± 0.1
14	O=S(CCN1C=CN=C1[N+]([O-])=O)(NCCO)=O	6.7 ± 2.8	0.8 ± 0.1	8 ± 3	12 ± 4	1.27 ±0.01
15	O=S(CCN1C=CN=C1[N+]([O-])=O)(NCCN2CCOCC2)=O	3.9 ± 0.1	0.40 ± 0.08	10 ± 2	6 ± 1	1.357 ±0.005
16	O=S(CN1C=C([N+]([O-])=O)N=C1)(NCCOC)=O	0.5±0.2	0.5 ± 0.3	1.1 ± 0.5	2.4 ± 0.5	1.105 ± 0.002
17	O=S(CN1C([N+]([O-])=O)=CN=C1)(NCCOC)=O	0.2 ±0.1	0.07 ± 0.02	1.8 ± 0.7	1.5 ± 0.3	1.10 ± 0.01
18	O=S(CN1C=C([N+]([O-])=O)N=C1)(NCCO)=O	2.9 ± 0.9	>6	<0.5
19	O=S(CN1C([N+]([O-])=O)=CN=C1)(NCCO)=O	8.5 ± 3	2.3 ± 0.8	4 ± 3	181 ± 80	1.81 ± 0.04
20	O=S(CN1C=C([N+]([O-])=O)N=C1)(NCCN2CCOCC2)=O	4.0 ± 0.8	3.3 ± 1.4	1.3 ± 0.4	7 ± 3
21	O=S(CN1C([N+]([O-])=O)=CN=C1)(NCCN2CCOCC2)=O	3.0 ±0.9	2.1 ± 0.4	1.4 ± 0.3	60 ± 17	1.43
22	O=S(CCN1C([N+]([O-])=O)=CN=C1)(NCCOC)=O	>10.3	4.4 ± 0.5	2.5	122 ± 50	1.56 ± 0.02
23	O=S(CCN1C=C([N+]([O-])=O)N=C1)(NCCOC)=O	5.3	>5.3	ND	9 ± 1
24	O=S(CCN1C([N+]([O-])=O)=CN=C1)(NCCO)=O	10.9 ± 0.6	5.3 ± 0.2	2 ± **	282 ± 100	1.81 ± 0.04
25	O=S(CCN1C=C([N+]([O-])=O)N=C1)(NCCO)=O	11 ± 2	10.9 ± 2.3	1.0 ± **	6.3 ± 0.3
26	O=S(CCN1C([N+]([O-])=O)=CN=C1C)(NCCOC)=O	4.6 ±0.7	2.9 ± 0.4	1.62 ±0.05	5.3 ± 0.2	1.34 ± 0.01
27	O=S(CCN1C([N+]([O-])=O)=CN=C1C)(NCCCOC)=O	4.6 ± 1.8	3.7 ± 0.3	1.2 ± 0.4	5 ± 1
28	O=S(CCN1C([N+]([O-])=O)=CN=C1C)(NCCO)=O	0.60 ± 0.05	0.4 ± 0.4	1.3 ± 0.8	3.4 ± 0.3	1.176 ±0.001
29	O=S(CCN1C([N+]([O-])=O)=CN=C1C)(NCCN2CCOCC2)=O	1.17 ± 0.08	0.8 ± 0.2	1.4 ± 0.2	2.71 ± 0.03
30	O=S(CCN1C([N+]([O-])=O)=CN=C1C)(NCCCN2CCOCC2)=O	1.6 ± 0.3	2.8 ± 1.0	0.8 ± 0.3	8 ± 2	1.68 ±0.04
31	O=S(CCN1C([N+]([O-])=O)=CN=C1C)(NCCN(C)C)=O	3.4 ± 1.5	0.8 ± 0.4	6 ± 6	11 ± 4	1.57 ± .01
32	O=S(CCN1C([N+]([O-])=O)=CN=C1C)(NCCCN(C)C)=O	3.8 ±1.3	1.2 ± 0.3	3 ± 1	8 ± 4
33	O=S(CCN1C([N+]([O-])=O)=CN=C1C)(NCCN(CC)CC)=O	2.5 ± 0.9	1.3 ± 0.3	2.0 ± 0.4	9 ± 3
34	O=S(CCN1C([N+]([O-])=O)=CN=C1C)(NCCN2CCCC2)=O	1.17 ±0.02	0.7 ± 0.3	1.8 ± 0.7	20.3 ± 0.1	1.54 ± 0.02
35	O=S(CCN1C([N+]([O-])=O)=CN=C1C)(NCCN2CCCCC2)=O	1.8 ±1.0	1.3 ± 0.7	2 ± 2	15 ± 5	1.71 ± 0.02
36	O=S(CCN1C([N+]([O-])=O)=CN=C1C)(N2CCOCC2)=O	0.06 ± 0.01	0.038 ± 0.004	1.5 ± 0.2	1.33 ± 0.03
37	O=S(CCN1C([N+]([O-])=O)=CN=C1C)(N2CCN(C)CC2)=O	1.0 ±0.3	1.5 ± 0.8	0.5 ± **	1.8 ± 0.3
38	O=S(CCN1C([N+]([O-])=O)=CN=C1C)(N2CCC(N(C)C)CC2)=O	2.0 ± 0.9	0.7 ± 0.3	2.9 ± 0.6	12 ± 5	1.67 ± 0.03
39	O=S(CN1C=CN=C1[N+]([O-])=O)(NCCOP(O)(O)=O)=O
40	O=S(CCN1C=CN=C1[N+]([O-])=O)(NCCOP(O)(O)=O)=O
41	O=S(CN1C([N+]([O-])=O)=CN=C1)(NCCOP(O)(O)=O)=O
42	O=S(CCN1C([N+]([O-])=O)=CN=C1)(NCCOP(O)(O)=O)=O
